# Supplementary material
Source: Springer Nature journal article supplement (https://www.springermedizin.de/resource/supplementary/12889_2014_7199_MOESM3_ESM.pdf/9497078)
Supplement: MOESM3 [file 9497078]

**Data Extraction Form**  
**For all texts in the full-text reading phase**

**Title of Review: Is adaptation to heat reducing heat-related mortality and illness? A systematic review**

*Review Reference no.*

**1. Publication Details**

1.1 *Author(s):*

1.2. *Country of authors (First author if several):*

1.3. *Year of publication:*

1.4 *Reviewer comments:*

1.5 *Eligible for review?*

1.6 *If excluded, reasons for exclusion:*

1.7 *Authors' conclusions (short summary):*

**2. Study details**

2.1 *Study aims (main research question):*

2.2 *Additional research questions addressed:*

2.3 *Study design:*

Quantitative:            qualitative:            mixed methods:

Other study type:

2.4 *Study type:*

2.5 *Methods of data collection:*

2.6 *Who collected data?*

Researchers:

Peers (trained participants, participatory approach):

Secondary data set used:

Other person:

2.7 *Methods used:*

2.8 *Conceptual/theoretical framework underlying the study:*

2.9 *Country or Countries in which study was conducted*

2.10 *Study duration:*

2.11 *Any stakeholders involved in study design or conduct?*

2.12 *[Target population (if applicable):*

*Participant number*

*age,*

*0-20 years:*

*21-60:*

*60plus:*

*gender,*

*ethnicities,*

*socio-demographic information,*

*Morbidities*

*Sampling strategy for participant recruitment*

2.13 Which **health outcomes** are studied?

2.14 Which **other effects** are studied if any?

### **3. Adaptation-specific general information:**

#### *3.1 Time frame of*

a) Adaptation measure:

b) Effects :

#### *3.2 Spatial scale of adaptation:*

Community level (i.e .one city, or one part of a city):

Regional level:

National level:

Global level (an adaptation program designed to be implemented in several countries at the same time with the same design):

No info available:

#### *3.3 Region of the adaptation measure:*

North America:

Central America:

South America:

Western Europe:

Central Europe:

Eastern Europe:

Middle East:

Northern Africa:

Sub-Saharan Africa:

Central and West Asia:

East Asia:

South-East Asia and Pacific:

South Asia:

Australia & New Zealand:

#### *3.4 Sectors studied:*

Health sector:

Other sectors (please specify):

### *3.5 Stakeholders involved in adaptation:*

If none:

NGO municipal:

NGO national:

NGO international:

Government municipal:

Government national:

Government international (i.e. UN):

Private industry:

Households or individuals:

### *3.6 Vulnerable groups specifically mentioned as target population?*

Coastal cities:

Small island states:

Women:

Children:

Older persons:

Lower income populations:

Other (please specify):

## **4. Adaptation process and outcomes:**

### *4.1 Timing:*

Anticipatory:

Responsive:

No information available:

### *4.2 Type of adaptation:*

Structural (infrastructural, i.e. dams):

Behavioral (includes awareness raising, perception):

Warning system:

Technological adaptation EXCEPT warning system (i.e. air conditioning):

Emergency action plan (includes all emergency policy plans):

#### 4.3 *Evaluation of adaptation conducted?*

Yes:            no:

#### 4.4 *Outcome measures used:*

#### 4.5 *Details of findings:*

*Effects estimated? Effect sizes mentioned?*

Yes:   No:    n/a:

If yes: extract exact numbers for further calculations.

*(Reminder:*

***Outcomes:*** *impacts on heat stroke incidence and cardiovascular mortality. Impacts measured as reduction in heat stroke incidence and cases of cardiovascular mortality in extreme heat periods.*

*Effectiveness measured medically as reduction in heat stroke incidence and cardiovascular mortality. Effectiveness measured by heat island exposure reduction signaled through changes in these risk factors:*

- *awareness of heat-appropriate behavior,*
- *green roofs,*
- *air conditioning,*
- *shaded buildings,*
- *early heat wave warning systems,*
- *risk communication strategies. )*
